# Supplementary material
Source: PubMed Central journal article supplement (PMC3295746)
Supplement: supp_djr543_jnci-JNCI-11-1002-s01.pdf [file supp_djr543_jnci-JNCI-11-1002-s01.pdf]

**Supplementary Table 1.** Estimated hazard ratios (HRs) of recurrence or death and 95% confidence intervals (CIs) from multivariable models for disease-free survival in patients with hormone receptor–positive and HER2-negative or unknown disease\*

| Covariate                                  | Model 1             |          | Model 2             |          | Model 3             |          | Model 4                                            |          |
|--------------------------------------------|---------------------|----------|---------------------|----------|---------------------|----------|----------------------------------------------------|----------|
|                                            | HR (95% CI)         | <i>P</i> | HR (95% CI)         | <i>P</i> | HR (95% CI)         | <i>P</i> | HR (95% CI)                                        | <i>P</i> |
| Age at diagnosis: <50 vs ≥50 y             | 0.97 (0.83 to 1.14) | .756     | 1.02 (0.86 to 1.19) | .850     | 0.99 (0.84 to 1.17) | .909     | 1.00 (0.85 to 1.17)                                | .960     |
| Positive nodes: 1–3 vs 0                   | 1.44 (0.99 to 2.11) | .056     | 1.44 (0.99 to 2.10) | .079     | 1.44 (0.99 to 2.10) | .057     | 1.46 (1.00 to 2.13)                                | .050     |
| Positive nodes: ≥4 vs 0                    | 2.85 (1.96 to 4.14) | <.001    | 2.78 (1.91 to 4.04) | <.001    | 2.81 (1.93 to 4.08) | <.001    | 2.83 (1.95 to 4.12)                                | <.001    |
| Tumor size: >2 vs ≤ 2 cm                   | 1.62 (1.35 to 1.94) | <.001    | 1.61 (1.34 to 1.93) | <.001    | 1.61 (1.34 to 1.92) | <.001    | 1.62 (1.35 to 1.94)                                | <.001    |
| Breast-sparing surgery vs mastectomy       | 1.04 (0.88 to 1.24) | .639     | 1.04 (0.88 to 1.24) | .639     | 1.05 (0.88 to 1.25) | .584     | 1.05 (0.88 to 1.25)                                | .588     |
| Tam alone vs AI ±Tam                       | 1.07 (0.90 to 1.27) | .426     | 1.08 (0.91 to 1.28) | .361     | 1.08 (0.91 to 1.28) | .369     | 1.08 (0.91 to 1.28)                                | .356     |
| No endocrine therapy or unknown vs AI ±Tam | 1.92 (1.46 to 2.51) | <.001    | 1.93 (1.47 to 2.53) | <.001    | 1.91 (1.45 to 2.50) | <.001    | 1.93 (1.47 to 2.53)                                | <.001    |
| Black vs nonblack                          | 1.66 (1.25 to 2.21) | <.001    | NA                  | NA       | 1.58 (1.18 to 2.11) | .002     | BMI ≥30 kg/m <sup>2</sup> :<br>1.19 (0.80 to 1.77) | .382     |
|                                            |                     |          |                     |          |                     |          | BMI <30 kg/m <sup>2</sup> :<br>2.38 (1.57 to 3.60) | <.001    |
| BMI: ≥30 vs <30 kg/m <sup>2</sup>          | NA                  | NA       | 1.27 (1.08 to 1.49) | .003     | 1.22 (1.04 to 1.44) | .014     | NA                                                 | NA       |

\*All *P* values are two-sided. Tam = tamoxifen; AI = aromatase inhibitor; BMI = body mass index; NA = not applicable.

**Supplementary Table 2.** Estimated hazard ratios (HRs) of death and 95% confidence intervals (CIs) from multivariable models for overall survival in patients with hormone receptor–positive and HER2-negative or unknown disease\*

| Covariate                                  | Model 1             |          | Model 2             |          | Model 3             |          | Model 4                     |          |
|--------------------------------------------|---------------------|----------|---------------------|----------|---------------------|----------|-----------------------------|----------|
|                                            | HR (95% CI)         | <i>P</i> | HR (95% CI)         | <i>P</i> | HR (95% CI)         | <i>P</i> | HR (95% CI)                 | <i>P</i> |
| Age at diagnosis: <50 vs ≥50 y             | 0.80 (0.66 to 0.98) | .031     | 0.84 (0.69 to 1.03) | .091     | 0.82 (0.67 to 1.01) | .057     | 0.83 (0.68 to 1.01)         | .066     |
| Positive nodes: 1–3 vs 0                   | 1.64 (0.99 to 2.72) | .053     | 1.65 (1.00 to 2.73) | .051     | 1.65 (1.00 to 2.74) | .050     | 1.68 (1.01 to 2.78)         | .044     |
| Positive nodes: ≥4 vs 0                    | 3.38 (2.06 to 5.56) | <.001    | 3.27 (1.99 to 5.38) | <.001    | 3.30 (2.01 to 5.44) | <.001    | 3.34 (2.03 to 5.50)         | <.001    |
| Tumor size: >2 vs ≤2 cm                    | 1.76 (1.41 to 2.21) | <.001    | 1.74 (1.39 to 2.18) | <.001    | 1.74 (1.39 to 2.18) | <.001    | 1.76 (1.40 to 2.20)         | <.001    |
| Breast-sparing surgery vs mastectomy       | 1.19 (0.96 to 1.48) | .114     | 1.20 (0.96 to 1.50) | .101     | 1.21 (0.97 to 1.51) | .091     | 1.21 (0.97 to 1.51)         | .091     |
| Tam alone vs AI ±Tam                       | 1.36 (1.11 to 1.66) | .004     | 1.36 (1.11 to 1.68) | .003     | 1.37 (1.11 to 1.68) | .003     | 1.37 (1.12 to 1.69)         | .003     |
| No endocrine therapy or unknown vs AI ±Tam | 2.39 (1.74 to 3.27) | <.001    | 2.37 (1.72 to 3.26) | <.001    | 2.35 (1.71 to 3.23) | <.001    | 2.39 (1.74 to 3.29)         | <.001    |
| Black vs nonblack                          | 1.64 (1.15 to 2.33) | .006     | NA                  | NA       | 1.51 (1.05 to 2.16) | .025     | BMI ≥30 kg/m <sup>2</sup> : | .800     |
|                                            |                     |          |                     |          |                     |          | BMI <30 kg/m <sup>2</sup> : | <.001    |
| BMI: ≥30 vs <30 kg/m <sup>2</sup>          | NA                  | NA       | 1.40 (1.15 to 1.69) | <.001    | 1.35 (1.11 to 1.64) | .003     | NA                          | NA       |

\*All *P* values are two-sided. Tam = tamoxifen; AI = aromatase inhibitor; BMI = body mass index; NA = not applicable.

**Supplementary Table 3.** Estimated hazard ratios (HRs) of death from breast cancer and 95% confidence intervals (CIs) from multivariable models for breast cancer –specific survival in patients with hormone receptor–positive and HER2-negative or unknown disease\*

| Covariate                                  | Model 1             |       | Model 2             |       | Model 3             |       | Model 4                     |       |
|--------------------------------------------|---------------------|-------|---------------------|-------|---------------------|-------|-----------------------------|-------|
|                                            | HR (95% CI)         | P     | HR (95% CI)         | P     | HR (95% CI)         | P     | HR (95% CI)                 | P     |
| Age at diagnosis: <50 vs ≥50 y             | 1.04 (0.83 to 1.31) | .734  | 1.10 (0.87 to 1.38) | .435  | 1.06 (0.85 to 1.34) | .595  | 1.07 (0.85 to 1.35)         | .550  |
| Positive nodes: 1–3 vs 0                   | 2.28 (1.15 to 4.51) | .018  | 2.29 (1.16 to 4.52) | .018  | 2.29 (1.16 to 4.52) | .018  | 2.32 (1.17 to 4.60)         | .016  |
| Positive nodes: ≥4 vs 0                    | 5.09 (2.59 to 9.98) | <.001 | 4.88 (2.49 to 9.59) | <.001 | 4.94 (2.52 to 9.70) | <.001 | 5.00 (2.55 to 9.82)         | <.001 |
| Tumor size: >2 vs ≤2 cm                    | 1.88 (1.44 to 2.45) | <.001 | 1.86 (1.42 to 2.43) | <.001 | 1.85 (1.42 to 2.42) | <.001 | 1.87 (1.43 to 2.45)         | <.001 |
| Breast-sparing surgery vs mastectomy       | 1.26 (0.97 to 1.63) | .080  | 1.28 (0.98 to 1.66) | .066  | 1.29 (0.99 to 1.67) | .059  | 1.29 (0.99 to 1.67)         | .060  |
| Tam alone vs AI ±Tam                       | 1.00 (0.79 to 1.28) | .980  | 1.01 (0.79 to 1.29) | .945  | 1.01 (0.79 to 1.29) | .937  | 1.01 (0.79 to 1.29)         | .913  |
| No endocrine therapy or unknown vs AI ±Tam | 1.80 (1.23 to 2.65) | .003  | 1.84 (1.25 to 2.69) | .002  | 1.82 (1.24 to 2.67) | .002  | 1.86 (1.26 to 2.73)         | .002  |
| Black vs nonblack                          | 1.81 (1.23 to 2.68) | .003  | NA                  | NA    | 1.65 (1.11 to 2.46) | .013  | BMI ≥30 kg/m <sup>2</sup> : | .562  |
|                                            |                     |       |                     |       |                     |       | BMI <30 kg/m <sup>2</sup> : | <.001 |
| BMI: ≥30 vs <30 kg/m <sup>2</sup>          | NA                  |       | 1.45 (1.16 to 1.82) | .001  | 1.39 (1.11 to 1.75) | .005  | NA                          | NA    |

\*All P values are two-sided. Tam = tamoxifen; AI = aromatase inhibitor; BMI = body mass index; NA = not applicable.

**Supplementary Table 4.** Most common grade 3 and 4 toxicity during chemotherapy\*

| <b>Treatment group</b>              | <b>Black patients, %</b> | <b>Nonblack patients, %</b> | <b><i>P</i> †</b> |
|-------------------------------------|--------------------------|-----------------------------|-------------------|
| <b>AC Chemotherapy</b>              |                          |                             |                   |
| Neutropenia (grade 4 only)          | 31                       | 38                          | .017              |
| Febrile neutropenia                 | 8                        | 6                           | .18               |
| Infection                           | 7                        | 10                          | .14               |
| Cardiac toxicity                    | 0.3                      | 0.1                         | .30               |
| <b>Taxane therapy</b>               |                          |                             |                   |
| Neutropenia (grade 4 only)          | 13                       | 14                          | .63               |
| Febrile neutropenia                 | 5                        | 4                           | .49               |
| Infection                           | 6                        | 6                           | .63               |
| Myalgia                             | 5                        | 4                           | .32               |
| Arthralgia                          | 4                        | 4                           | .77               |
| Neuropathy                          |                          |                             |                   |
| Grade 3 or 4                        | 7                        | 5                           | .11               |
| Grade 2, 3, or 4                    | 25                       | 19                          | .020              |
| <b>During AC and taxane therapy</b> |                          |                             |                   |
| Hypertension (any grade)            | 9.8                      | 1.5                         | .16               |

\*AC = doxorubicin and cyclophosphamide.

† *P* values are two-sided and calculated from the Fisher exact test.
